# Supplementary material for: Changes in nut consumption influence long-term weight change in US men and women
Source: PubMed Central journal article supplement — BMJ Nutr Prev Health. 2019 Sep 23;2(2):90–9. doi: 10.1136/bmjnph-2019-000034 (PMC7664489; doi:10.1136/bmjnph-2019-000034), 2019-09-23
Supplement: bmjnph-2019-000034supp001.pdf [file bmjnph-2019-000034supp001.pdf]

**S1 Table.** Multivariable adjusted weight change\* and relative risk (95% confidence intervals) for weight gain and incident obesity according to the joint categories of total nuts intake at the first and fourth years of each period based on pooled data of Nurses' Health Study I, Nurses' Health Study II, and the Health Professionals Follow-Up Study.

|                                    |              | <b>Consumption Tree nuts (serving/day)</b>         |                      |                      |                      |                      |                      |                      |                      |  |
|------------------------------------|--------------|----------------------------------------------------|----------------------|----------------------|----------------------|----------------------|----------------------|----------------------|----------------------|--|
| <b>1<sup>st</sup> year intakes</b> | <b>0</b>     | <b>0.1-0.49</b>                                    | <b>≥0.5</b>          | <b>0</b>             | <b>0.1-0.49</b>      | <b>≥0.5</b>          | <b>0</b>             | <b>0.1-0.49</b>      | <b>≥0.5</b>          |  |
| <b>4<sup>th</sup> year intakes</b> | <b>0</b>     | <b>0</b>                                           | <b>0</b>             | <b>0.1-0.49</b>      | <b>0.1-0.49</b>      | <b>0.1-0.49</b>      | <b>≥0.5</b>          | <b>≥0.5</b>          | <b>≥0.5</b>          |  |
| <b><u>Weight Change (kgs)</u></b>  |              |                                                    |                      |                      |                      |                      |                      |                      |                      |  |
| Means                              | 1.46±0.01    | 1.33±0.02*                                         | 1.21±0.13*           | 1.42±0.02            | 1.37±0.01*           | 1.39±0.06            | 0.60±0.06*           | 0.80±0.04*           | 1.11±0.04*           |  |
| Differences <sup>1</sup>           | 0            | -0.13±0.02*                                        | -0.25±0.13*          | -0.04±0.02           | -0.09±0.02*          | -0.07±0.06           | -0.86±0.07*          | -0.67±0.04*          | -0.35±0.04*          |  |
| <b><u>Weight gain (≥2kg)</u></b>   |              |                                                    |                      |                      |                      |                      |                      |                      |                      |  |
| Cases (prevalence)                 | 84019 (45.7) | 23531(42.1)                                        | 746 (40.1)           | 32318 (43.1)         | 42131 (40.4)         | 3353 (38.7)          | 2290 (34.2)          | 6016 (33.0)          | 3437 (32.1)          |  |
| Relative Risk <sup>2</sup>         | 1            | 0.98<br>(0.97, 0.99)                               | 0.99<br>(0.94, 1.05) | 0.99<br>(0.98, 1.00) | 0.97<br>(0.97, 0.98) | 0.98<br>(0.96, 1.01) | 0.85<br>(0.83, 0.88) | 0.85<br>(0.84, 0.87) | 0.85<br>(0.83, 0.88) |  |
| <b><u>Weight gain (≥5kg)</u></b>   |              |                                                    |                      |                      |                      |                      |                      |                      |                      |  |
| Cases (prevalence)                 | 35510 (19.3) | 9292 (16.6)                                        | 316 (17.0)           | 13217 (17.6)         | 15627 (15.0)         | 1281 (14.8)          | 833 (12.4)           | 2043 (11.2)          | 1164 (10.9)          |  |
| Relative Risk <sup>2</sup>         | 1            | 0.96<br>(0.94, 0.98)                               | 1.02<br>(0.93, 1.13) | 0.98<br>(0.96, 1.00) | 0.92<br>(0.91, 0.94) | 0.94<br>(0.89, 0.99) | 0.78<br>(0.73, 0.83) | 0.76<br>(0.73, 0.79) | 0.78<br>(0.74, 0.82) |  |
| <b><u>Incident Obesity</u></b>     |              |                                                    |                      |                      |                      |                      |                      |                      |                      |  |
| Cases (incidence)                  | 9310 (6.32)  | 2436 (5.39)                                        | 92 (6.20)            | 3654 (6.15)          | 4296 (5.11)          | 332 (4.82)           | 241 (4.49)           | 631 (4.27)           | 330 (3.61)           |  |
| Relative Risk <sup>3</sup>         | 1            | 0.91<br>(0.88, 0.95)                               | 0.98<br>(0.82, 1.19) | 1.01<br>(0.98, 1.05) | 0.90<br>(0.86, 0.93) | 0.79<br>(0.71, 0.87) | 0.78<br>(0.70, 0.88) | 0.76<br>(0.71, 0.82) | 0.63<br>(0.57, 0.69) |  |
|                                    |              | <b><u>Consumption of Walnuts (serving/day)</u></b> |                      |                      |                      |                      |                      |                      |                      |  |
| <b><u>Weight Change (kg)</u></b>   |              |                                                    |                      |                      |                      |                      |                      |                      |                      |  |
| Means                              | 0.78±0.02    | 0.76±0.04                                          | 0.65±0.33            | 0.77±0.03            | 0.69±0.02            | 0.35±0.13            | 0.00±0.13            | 0.17±0.09            | 0.70±0.13            |  |
| Differences <sup>1</sup>           | 0            | -0.01±0.05                                         | -0.13±0.33           | -0.01±0.04           | -0.09±0.03           | -0.43±0.13           | -0.78±0.13*          | -0.61±0.09*          | -0.08±0.13           |  |
| <b><u>Weight gain (≥2kg/)</u></b>  |              |                                                    |                      |                      |                      |                      |                      |                      |                      |  |
| Cases (prevalence)                 | 153959(44.1) | 6367 (38.3)                                        | 125 (34.4)           | 21327 (39.8)         | 13699 (36.0)         | 535 (33.3)           | 641 (31.3)           | 872 (29.3)           | 316 (28.9)           |  |
| Relative Risk <sup>2</sup>         | 1            | 1.00<br>(0.98,1.02)                                | 0.92<br>(0.80,1.05)  | 0.99<br>(0.98,1.01)  | 0.96<br>(0.94,0.97)  | 0.88<br>(0.82,0.94)  | 0.82<br>(0.76,0.88)  | 0.82<br>(0.77,0.87)  | 0.83<br>(0.76,0.91)  |  |
| <b><u>Weight gain (≥5kg/)</u></b>  |              |                                                    |                      |                      |                      |                      |                      |                      |                      |  |
| Cases (prevalence)                 | 62504 (17.9) | 2544 (15.3)                                        | 55 (15.2)            | 8345 (15.6)          | 5006 (13.2)          | 215 (13.4)           | 222 (10.8)           | 287 (9.7)            | 105 (9.6)            |  |
| Relative Risk <sup>2</sup>         | 1            | 0.98<br>(0.94,1.01)                                | 0.94<br>(0.75,1.20)  | 0.97<br>(0.94,1.00)  | 0.88<br>(0.85,0.90)  | 0.88<br>(0.78,0.99)  | 0.76<br>(0.66,0.87)  | 0.73<br>(0.65,0.81)  | 0.75<br>(0.63,0.90)  |  |
| <b><u>Incident Obesity</u></b>     |              |                                                    |                      |                      |                      |                      |                      |                      |                      |  |
| Cases (incident)                   | 4369 (6.38)  | 731(5.97)                                          | 13 (4.89)            | 1436(5.91)           | 1474(5.04)           | 56(4.31)             | 64(4.79)             | 89(3.63)             | 36(3.88)             |  |
| Relative Risk <sup>3</sup>         | 1            | 0.96<br>(0.89,1.04)                                | 0.75<br>(0.45,1.25)  | 0.96<br>(0.91,1.01)  | 0.83<br>(0.79,0.88)  | 0.68<br>(0.53,0.88)  | 0.82<br>(0.66,1.04)  | 0.65<br>(0.53,0.79)  | 0.69<br>(0.51,0.94)  |  |

| <b>Consumption of other tree nuts (serving/day)</b> |                  |                      |                      |                      |                      |                      |                      |                      |                      |
|-----------------------------------------------------|------------------|----------------------|----------------------|----------------------|----------------------|----------------------|----------------------|----------------------|----------------------|
| <b>1<sup>st</sup> year intakes</b>                  | <b>None</b>      | <b>0.1-0.49</b>      | <b>≥0.5</b>          | <b>0</b>             | <b>0.1-0.49</b>      | <b>≥0.5</b>          | <b>0</b>             | <b>0-0.5</b>         | <b>≥0.5</b>          |
| <b>4<sup>th</sup> year intakes</b>                  | <b>0</b>         | <b>0</b>             | <b>0</b>             | <b>0.1-0.49</b>      | <b>0.1-0.49</b>      | <b>0.1-0.49</b>      | <b>≥0.5</b>          | <b>≥0.5</b>          | <b>≥0.5</b>          |
| <b><u>Weight Change (kgs)</u></b>                   |                  |                      |                      |                      |                      |                      |                      |                      |                      |
| Means                                               | 0.81±0.02        | 0.72±0.04            | 0.99±0.19            | 0.77±0.03            | 0.76±0.02            | 0.92±0.08            | -0.15±0.09           | 0.11±0.06            | 0.67±0.08            |
| Differences <sup>1</sup>                            | 0                | -0.09±0.05           | 0.18±0.19            | -0.03±0.04           | -0.05±0.03           | 0.11±0.08            | -0.95±0.09*          | -0.69±0.06*          | -0.13±0.08           |
| <b><u>Weight gain (≥2kg)</u></b>                    |                  |                      |                      |                      |                      |                      |                      |                      |                      |
| Cases (prevalence)                                  | 137634<br>(44.7) | 6838 (38.6)          | 418 (42.4)           | 26736 (40.5)         | 19855 (37.2)         | 1682 (38.4)          | 1512 (31.6)          | 2180 (30.4)          | 986 (33.3)           |
| Relative Risk <sup>2</sup>                          | 1                | 1.00<br>(0.98,1.02)  | 1.11<br>(1.03,1.20)  | 0.99<br>(0.97,1.00)  | 0.97<br>(0.96,0.99)  | 1.00<br>(0.96,1.04)  | 0.83<br>(0.78,0.87)  | 0.83<br>(0.80,0.86)  | 0.92<br>(0.88,0.97)  |
| <b><u>Weight gain (≥5kg)</u></b>                    |                  |                      |                      |                      |                      |                      |                      |                      |                      |
| Cases (prevalence)                                  | 55799 (18.1)     | 2844 (16.1)          | 196 (19.9)           | 10614 (16.1)         | 7558 (14.2)          | 670 (15.3)           | 541 (11.3)           | 733 (10.2)           | 328 (11.1)           |
| Relative Risk <sup>2</sup>                          | 1                | 0.99<br>(0.94,1.03)  | 1.26<br>(1.10, 1.44) | 0.97<br>(0.93,1.00)  | 0.92<br>(0.89,0.95)  | 0.97<br>(0.89,1.05)  | 0.78<br>(0.71,0.87)  | 0.75<br>(0.70,0.81)  | 0.82<br>(0.73,0.92)  |
| <b><u>Incident Obesity</u></b>                      |                  |                      |                      |                      |                      |                      |                      |                      |                      |
| Cases (incidence)                                   | 2817 (6.58)      | 823 (6.50)           | 55 (7.10)            | 1757 (6.06)          | 2219 (5.48)          | 184 (5.20)           | 105 (3.74)           | 238 (4.01)           | 70 (2.72)            |
| Relative Risk <sup>3</sup>                          | 1                | 1.01<br>(0.94,1.08)  | 1.04<br>(0.81,1.3)   | 0.95<br>(0.90,1.00)  | 0.89<br>(0.84,0.94)  | 0.80<br>(0.70,0.92)  | 0.61<br>(0.51,0.74)  | 0.69<br>(0.61,0.78)  | 0.46<br>(0.37,0.58)  |
| <b><u>Consumption of peanuts (serving/day)</u></b>  |                  |                      |                      |                      |                      |                      |                      |                      |                      |
| <b><u>Weight Change (kg)</u></b>                    |                  |                      |                      |                      |                      |                      |                      |                      |                      |
| Means                                               | 1.39±0.01        | 1.26±0.02*           | 1.19±0.13            | 1.46±0.02*           | 1.38±0.01            | 1.58±0.06*           | 0.59±0.11*           | 0.91±0.06*           | 1.34±0.07            |
| Differences <sup>1</sup>                            | 0                | -0.13±0.02*          | -0.20±0.13           | 0.07±0.02*           | 0.00±0.02            | 0.19±0.06*           | -0.80±0.11*          | -0.48±0.06*          | -0.05±0.07           |
| <b><u>Weight gain(≥2kg/)</u></b>                    |                  |                      |                      |                      |                      |                      |                      |                      |                      |
| Cases (prevalence)                                  | 78070 (44.5)     | 28332 (41.6)         | 622 (37.7)           | 30658 (43.7)         | 53509 (40.8)         | 2481 (39.9)          | 776 (33.2)           | 2359 (33.5)          | 1034 (33.9)          |
| Relative Risk <sup>2</sup>                          | 1                | 0.98<br>(0.97, 0.99) | 0.95<br>(0.90, 1.02) | 1.02<br>(1.01, 1.03) | 1.00<br>(0.99, 1.00) | 1.04<br>(1.01, 1.07) | 0.84<br>(0.79, 0.90) | 0.89<br>(0.86, 0.92) | 0.96<br>(0.91, 1.01) |
| <b><u>Weight gain (≥5kg/)</u></b>                   |                  |                      |                      |                      |                      |                      |                      |                      |                      |
| Cases (prevalence)                                  | 33245 (18.9)     | 11334 (16.7)         | 256 (15.5)           | 12642 (18.0)         | 19449 (14.8)         | 931 (15.0)           | 314 (13.4)           | 814 (11.6)           | 298 (9.8)            |
| Relative Risk <sup>2</sup>                          | 1                | 0.95<br>(0.93, 0.97) | 1.02<br>(0.90, 1.15) | 1.01<br>(0.99, 1.03) | 0.91<br>(0.90, 0.93) | 1.04<br>(0.98, 1.11) | 0.87<br>(0.78, 0.98) | 0.84<br>(0.78, 0.90) | 0.81<br>(0.72, 0.91) |
| <b><u>Incident Obesity</u></b>                      |                  |                      |                      |                      |                      |                      |                      |                      |                      |
| Cases (incident)                                    | 8628 (6.16)      | 3067(5.62)           | 74 (5.40)            | 3495 (6.30)          | 5435 (5.10)          | 250 (4.77)           | 79 (4.21)            | 205 (3.50)           | 89 (3.29)            |
| Relative Risk <sup>3</sup>                          | 1                | 0.96<br>(0.92, 1.00) | 0.96<br>(0.78, 1.17) | 1.05<br>(1.01, 1.09) | 0.93<br>(0.90, 0.96) | 0.89<br>(0.79, 1.00) | 0.77<br>(0.63, 0.93) | 0.69<br>(0.61, 0.79) | 0.69<br>(0.57, 0.84) |

| <b>Consumption of peanut butter (serving/day)</b> |              |                      |                      |                      |                      |                      |                      |                      |                      |
|---------------------------------------------------|--------------|----------------------|----------------------|----------------------|----------------------|----------------------|----------------------|----------------------|----------------------|
| <b>1<sup>st</sup> year intakes</b>                | <b>0</b>     | <b>0.1-0.49</b>      | <b>≥0.5</b>          | <b>0</b>             | <b>0.1-0.49</b>      | <b>≥0.5</b>          | <b>0</b>             | <b>0.1-0.49</b>      | <b>≥0.5</b>          |
| <b>4<sup>th</sup> year intakes</b>                | <b>0</b>     | <b>0</b>             | <b>0</b>             | <b>0.1-0.49</b>      | <b>0.1-0.49</b>      | <b>0.1-0.49</b>      | <b>≥0.5</b>          | <b>≥0.5</b>          | <b>≥0.5</b>          |
| <b><u>Weight Change (kg)</u></b>                  |              |                      |                      |                      |                      |                      |                      |                      |                      |
| Means                                             | 1.34±0.01    | 1.22±0.02            | 0.94±0.11            | 1.46±0.02            | 1.43±0.01            | 1.56±0.04            | 0.75±0.11            | 1.00±0.04            | 1.30±0.04            |
| Differences <sup>1</sup>                          | 0            | -0.12±0.03           | -0.40±0.12           | 0.12±0.03            | 0.10±0.02            | 0.23±0.04            | -0.59±0.11           | -0.34±0.04           | -0.04±0.04           |
| <b><u>Weight gain (≥2kg)</u></b>                  |              |                      |                      |                      |                      |                      |                      |                      |                      |
| Cases (prevalence)                                | 40349(42.3)  | 21357<br>(42.9)      | 971 (39.2)           | 22451 (43.5)         | 90064 (43.1)         | 7875 (42.9)          | 1218 (39.1)          | 8163 (38.5)          | 5393 (37.7)          |
| Relative Risk <sup>2</sup>                        | 1            | 0.99<br>(0.98, 1.00) | 0.95<br>(0.91, 1.00) | 1.01<br>(1.00, 1.02) | 1.01<br>(1.00, 1.02) | 1.03<br>(1.01, 1.05) | 0.96<br>(0.92, 1.00) | 0.95<br>(0.93, 0.96) | 0.95<br>(0.93, 0.98) |
| <b><u>Weight gain (≥5kg)</u></b>                  |              |                      |                      |                      |                      |                      |                      |                      |                      |
| Cases (prevalence)                                | 15943 (16.7) | 8763 (17.6)          | 422 (17.0)           | 9422 (18.2)          | 35753 (17.1)         | 3269 (17.8)          | 492 (15.8)           | 3213 (15.2)          | 2006 (14.0)          |
| Relative Risk <sup>2</sup>                        | 1            | 0.99<br>(0.97, 1.01) | 1.03<br>(0.95, 1.12) | 1.03<br>(1.01, 1.05) | 0.98<br>(0.96, 1.00) | 1.05<br>(1.02, 1.09) | 0.95<br>(0.88, 1.03) | 0.92<br>(0.89, 0.95) | 0.93<br>(0.89, 0.97) |
| <b><u>Incident Obesity</u></b>                    |              |                      |                      |                      |                      |                      |                      |                      |                      |
| Cases (incident)                                  | 1212 (5.3)   | 894 (6.4)            | 29 (4.6)             | 600 (5.8)            | 2862 (6.0)           | 290 (6.3)            | 26 (5.5)             | 168 (4.5)            | 114 (3.9)            |
| Relative Risk <sup>3</sup>                        | 1            | 1.08<br>(1.04, 1.14) | 0.88<br>(0.73, 1.07) | 1.08<br>(1.03, 1.13) | 1.10<br>(1.06, 1.14) | 1.13<br>(1.05, 1.20) | 1.04<br>(0.90, 1.22) | 0.97<br>(0.91, 1.04) | 0.93<br>(0.86, 1.01) |

\*Results are pooled from HPFS, NHS and NHS II

<sup>1</sup> Differences in weight change compare those who never or almost never consume nuts.

<sup>2</sup> Relative Risk of weight gain was calculated by multivariate model adjusted for age, menopausal status (pre- or postmenopausal) and hormone therapy use (never, past, or current) in women; baseline BMI of every 4 year; hours of sleeping at baseline; changes in lifestyle factors: smoking status (never, former, current: 1 to 14, 15 to 24, or ≥25 cigarettes/day), physical activity (Met/h/wk), hours of sitting (hr/wk); changes in dietary factors: fruits, vegetables, alcohol, snacks, dessert, French fries, red or processed meat, whole grain, refined grain and sugar sweetened beverages. Participants who do not consume nuts were used as reference group.

<sup>3</sup> Relative Risk of incident obesity was calculated by multivariable model excluding the adjustment of baseline BMI of every 4-year interval. Participants who do not consume nuts were used as reference group
