# Supplementary material for: Changes in nut consumption influence long-term weight change in US men and women
Source: PubMed Central journal article supplement — BMJ Nutr Prev Health. 2019 Sep 23;2(2):90–9. doi: 10.1136/bmjnph-2019-000034 (PMC7664489; doi:10.1136/bmjnph-2019-000034), 2019-09-23

**S2 Fig.** Distribution of study population based on their changes of nut consumption within each 4-year period in the three prospective cohorts of US men and women over the time period 1986-2010<sup>1</sup>

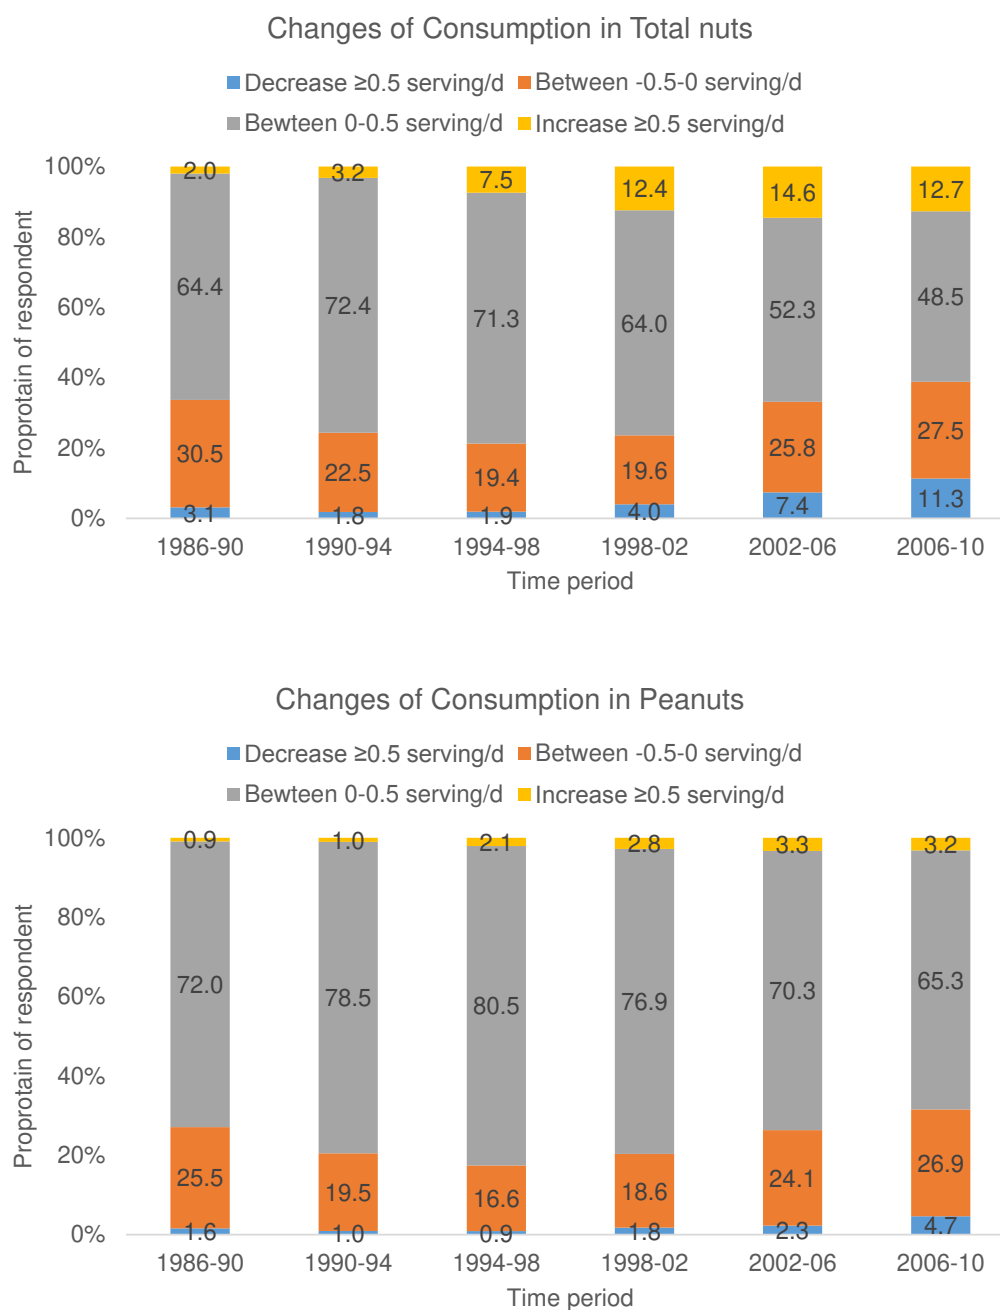

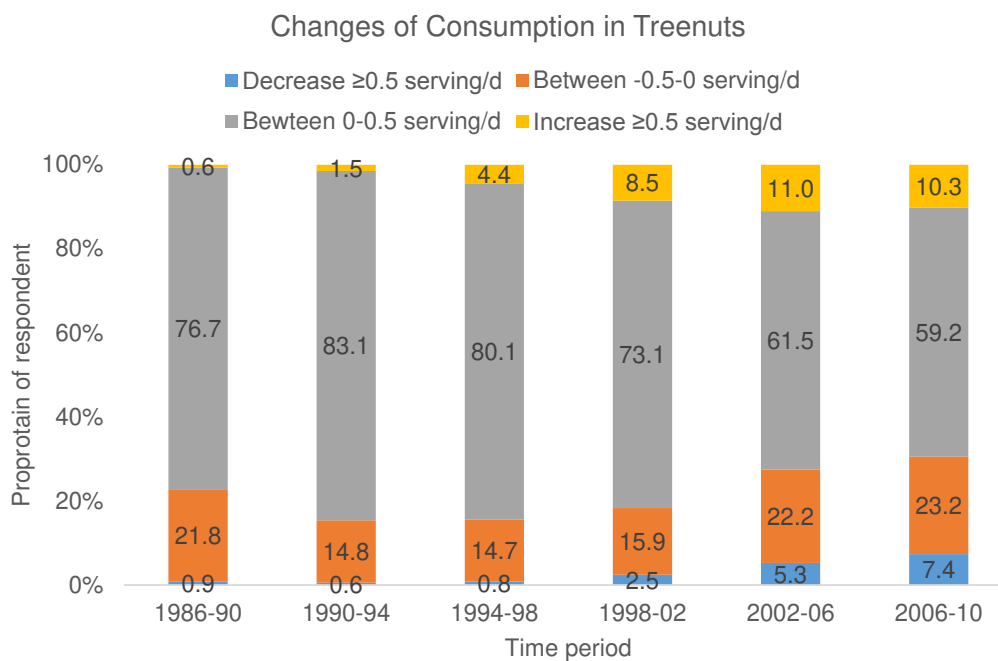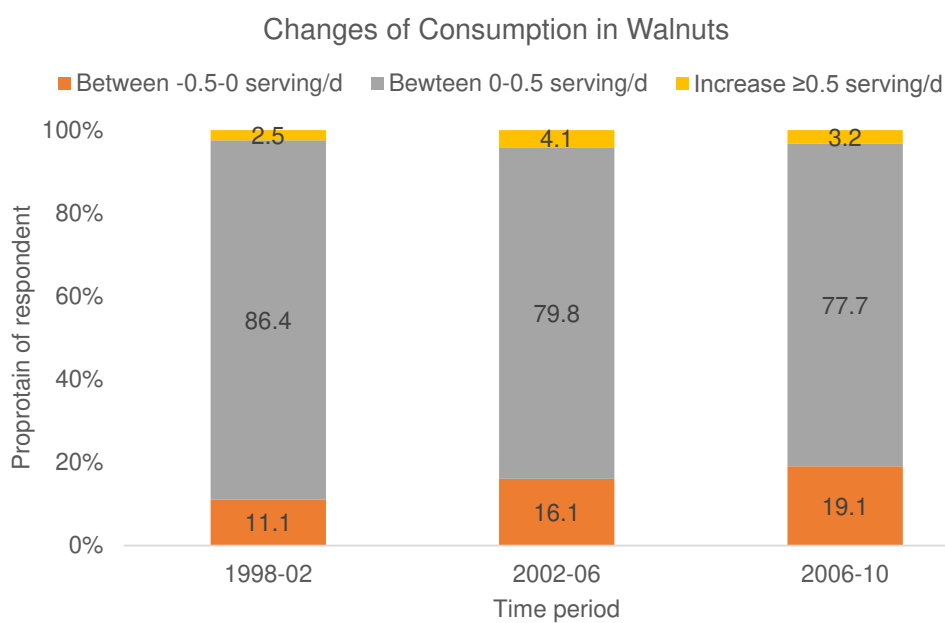

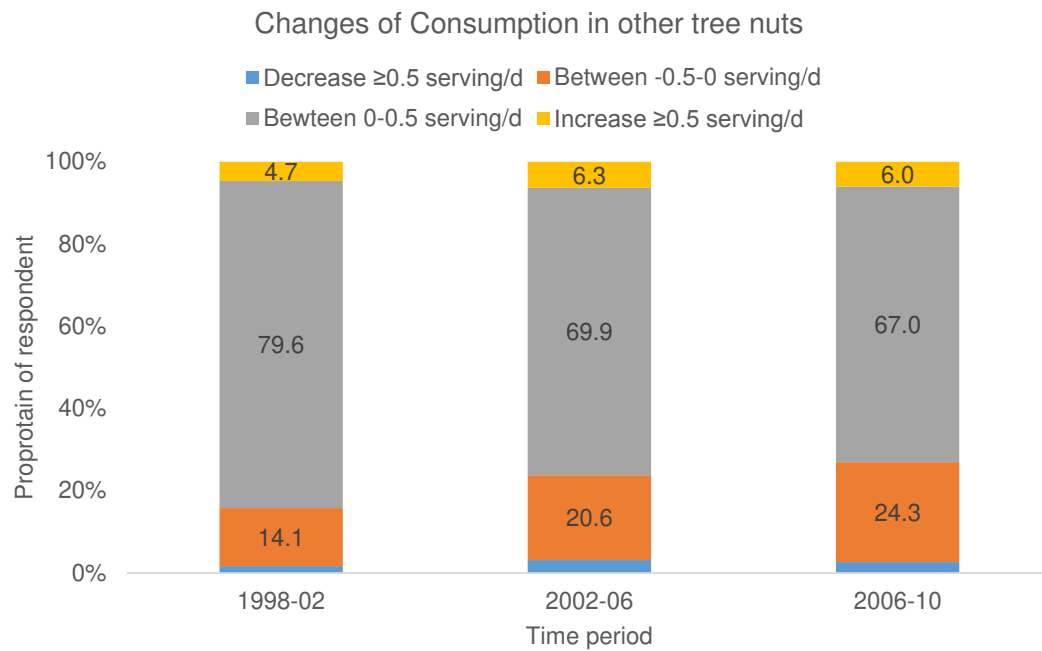

Supplement: bmjnph-2019-000034supp007.pdf [file bmjnph-2019-000034supp007.pdf]
